1 **Title:**

2 **Metabolic process of raffinose family oligosacharrides during cold stress and**  
3 **recovery in cucumber leaves**

4

5 **Short running title:** RFOs metabolism during cold stress and recovery

6

7 **Authors and affiliations:**

8 Man Lu( [1406061710@qq.com](mailto:1406061710@qq.com) ), Zhiping Zhang ( [zhangzp@yzu.edu.cn](mailto:zhangzp@yzu.edu.cn) ), Jinjin Xu

9 ( [1140315372@qq.com](mailto:1140315372@qq.com) ), Wenhua Cao ( [853942204@qq.com](mailto:853942204@qq.com) ), Minmin Miao

10 ( [mmmiao@yzu.edu.cn](mailto:mmmiao@yzu.edu.cn) )

11 School of Horticulture and Plant Protection, Key Laboratory of Plant Functional

12 Genomics of Ministry of Education, Yangzhou University, 12 Wenhui East Road,

13 Yangzhou 225009, China

14

15 **Corresponding author:** Minmin Miao; **Telephone number:** 86-514-87979395

16

17 **Submission date:**

18

19 **Number of tables:** 1

20 **Number of figures:** 7. Figure 6 and Figure 7 should be in colour (online only)

21 **Number of words:** 4168

22

23 **Supplementary data:**

24 **Number of tables:** 2

25 **Number of figures:** 4

26

27

28

29

30 **Metabolic process of raffinose family oligosacharrides during cold stress and**  
31 **recovery in cucumber leaves**

32

33 **Highlight:** This study provide several evidences that raffinose family  
34 oligosacharrides accumulated during cold stress in cucumber leaves are catabolized in  
35 different subcellular compartments by different alpha-galactosidases after temperature  
36 recovery.

37 **Abstract**

38 Raffinose family oligosacharrides (RFOs) accumulate under stress conditions in many  
39 plants and have been suggested to act as stress protectants. To elucidate the metabolic  
40 process of RFOs under cold stress, levels of RFOs and relative carbohydrates, the  
41 expression and activities of main metabolic enzymes and their subcellular  
42 compartments were investigated during low temperature treatment and recovery  
43 period in cucumber leaves. Cold stress induced the accumulation of stachyose in  
44 vacuoles, galactinol in vacuoles and cytosols, and sucrose and raffinose in vacuoles,  
45 cytosols and chloroplasts. After cold stress removal, levels of these sugars decreased  
46 gradually in respective compartments. Among 4 galactinol synthase genes (*CsGS*),  
47 *CsGS1* was not affected by the cold stress, while other three *CsGSs* were up-regulated  
48 by the low temperature. RNA levels of *acid- $\alpha$ -galactosidase (GAL) 3*,  
49 *alkaline- $\alpha$ -galactosidase (AGA) 2* and 3, and the activities of GAL and AGA were  
50 up-regulated after cold stress removal. The GAL3 protein and GAL activity were  
51 exclusively located in the vacuole, whereas the protein of AGA2 and AGA 3 were  
52 found in the cytosol and chloroplast respectively. The results indicate that RFOs  
53 accumulated during the cold stress in different subcellular compartments in cucumber  
54 leaves could be catabolized *in situ* by different galactosidases after stress removal.

55

56 **Key Words:** cold stress, cucumber, de-acclimation, galactosidase, raffinose family  
57 oligosacharrides, subcellular compartment

58

## 59 **Introduction**

60 Raffinose family oligosaccharides (RFOs) are galactosyl extensions of sucrose that  
61 exist widely in the plant kingdom. The physiological functions of RFOs in higher  
62 plants have been studied detailedly in the past decades. RFOs are important storage  
63 carbohydrates in various plant tissues including leaves, stems, tubers, fruits and seeds,  
64 temporarily or terminally (Keller and Pharr, 1996; ElSayed *et al.*, 2014; Sengupta *et*  
65 *al.*, 2015; Ivamoto *et al.*, 2017). In addition, RFOs are used for phloem transport in  
66 some plants in Cucurbitaceae, Lamiaceae, Oleaceae, Scrophulariaceae and other  
67 several families (Keller and Pharr, 1996; ElSayed *et al.*, 2014; Sengupta *et al.*, 2015).

68 The important role of RFOs in the stress defence mechanism was also well  
69 established. RFOs are characterised as osmoprotectants or antioxidants, and may  
70 serve as signals in response to several abiotic or biotic stresses (Zuther *et al.*, 2004;  
71 ElSayed *et al.*, 2014; Sengupta *et al.*, 2015). In most sucrose-translocating plants, like  
72 rice (*Oryza sativa*) and Arabidopsis (*Arabidopsis thaliana*) that neither transport nor  
73 accumulate large quantities of RFOs in their tissues under normal conditions, the  
74 accumulation of RFOs and the induced expression of their biosynthetic enzymes,  
75 galactinol synthase (GS) and raffinose synthase (RS), were found in response to  
76 diverse abiotic stresses such as temperature extremes, drought and salinity (Nishizawa  
77 *et al.*, 2008; Saito and Yoshida, 2011; Gangl and Tenhaken, 2016).

78 Under stressed conditions, the increase of RFOs was also observed in  
79 RFOs-translocating plants. *Ajuga reptans*, a frost-hardy perennial labiate, accumulates  
80 much more RFOs in winter leaves than in summer leaves, and cold treatment would  
81 significantly increase the RFOs concentration in leaves (Bachmann *et al.*, 1994). In  
82 cucumber (*Cucumis sativus* L.), RS expression, RS activity and the content of  
83 raffinose and stachyose increased gradually in the leaves, fruits, stems and roots under  
84 low temperature stress (Meng *et al.*, 2008; Sui *et al.*, 2012). In these  
85 RFOs-translocating species, it seems that there are two pools of RFOs: a storage pool  
86 in the mesophyll (long-term in *Ajuga reptans* or short-term in cucumber), which is

87 involved in stress response, and a transport pool in the phloem (Bachmann and Keller,  
88 1995; Sui *et al.*, 2012).

89 GS is a key enzyme catalyzing the first step in the RFOs biosynthetic pathway  
90 (Keller and Pharr, 1996). Most plants have more than one isoform of GS coded by  
91 different genes. In *Ajuga reptans*, there are two GS genes, *ArGolS1* and *ArGolS2*.  
92 *ArGolS1* is mainly involved in the synthesis of storage RFOs while *ArGolS2* is for the  
93 synthesis of transport RFOs (Sprenger and Keller, 2000). In the cucumber genome, 4  
94 putative GS genes were found (Wang *et al.*, 2016). However, the exact roles of these  
95 genes in the stress response and phloem transport are not well investigated.

96 The subcellular localization of RFOs and their biosynthetic enzymes under low  
97 temperature stress were further studied in *Ajuga reptans* and *Arabidopsis*, the results  
98 showed that GS, RS and stachyose synthase (STS) were extravacuolar (most probably  
99 cytosolic), galactosyltransferase, stachyose and higher RFOs were vacuolar, and  
100 sucrose and raffinose were found in cytosol, vacuole and chloroplast (Bachmann and  
101 Keller, 1995; Tapernoux-Lüthi *et al.*, 2007; Schneider and Keller, 2009; Knaupp *et al.*,  
102 2011; Findling *et al.*, 2015). It is suggested that raffinose, rather than stacyose, plays  
103 an important role in stabilizing photosystem II in chloroplasts during low temperature  
104 stress in *Arabidopsis* (Iftime *et al.*, 2011; Knaupp *et al.*, 2011). As a crop of  
105 subtropical origin which translocate RFOs but not store large quantities of RFOs  
106 under the normal condition, does cucumber have different RFOs subcellular  
107 localization with the frost-hardy RFOs-translocating plant *Ajuga reptans* and the  
108 sucrose-translocating plant *Arabidopsis* under cold stress remains unknown.

109 In contrast to cold acclimation, cold de-acclimation is an important regulatory  
110 mechanism to ensure plants restoring to their normal growth state when the stress  
111 condition was removed. Unfortunately, although the accumulation of RFOs and its  
112 physiological significance under stress conditions have been well studied in several  
113 plants, how RFOs were catabolized after stress removal has received little attention.  
114 Alpha-galactosidases are responsible for the terminal galactose residue removing  
115 during RFOs catabolism (Keller and Pharr, 1996). There are 6 putative  
116  $\alpha$ -galactosidase genes in the cucumber genome. These genes are divided into 2 groups,

117 3 acid  $\alpha$ -galactosidase genes (*GAL*) and 3 alkaline  $\alpha$ -galactosidase genes (*AGA*),  
118 according to their activity in response to pH (Wang *et al.*, 2016). *GAL*s are considered  
119 to be localized in the apoplast space or vacuole, while *AGAs* are supposed to be  
120 localized in the cytosol (Keller and Pharr, 1996; Tapernoux-Lüthi *et al.*, 2007).  
121 Considering both RFOs and  $\alpha$ -galactosidases reveal multiple subcellular localizations,  
122 it is interesting to know if different  $\alpha$ -galactosidases catabolize the RFOs in different  
123 subcellular compartments when stress conditions are relieved.

124 In this study, in order to reveal the metabolic process of RFOs during cold stress,  
125 levels of RFOs and relative carbohydrates, the expression and activities of metabolic  
126 enzymes and their subcellular compartments were investigated during cold treatment  
127 and the recovery period in cucumber leaves. We emphasized the observation of the  
128 expression pattern, activity and intracellular localization of 6  $\alpha$ -galactosidases to  
129 elucidate the catabolic process of RFOs after stress removal.

130

## 131 **Materials and methods**

### 132 *Plant material and temperature treatment*

133 Cucumber (*Cucumis sativus* L.) cultivar Jinchun 5 (from Tianjin Cucumber Institute,  
134 China) was used in this study. Seedlings were grown in 10×10 cm plastic pots  
135 containing a peat–vermiculite mixture (2:1, v/v) in a growth chamber. The seedlings  
136 were thinned to one per pot 10 d after germination. Plants were watered once daily  
137 and fertilized weekly with the Hoagland nutrient solution. In the growth chamber, the  
138 temperatures were 28°C/22°C (day/night) and the relative humidity 70%. Light was  
139 provided by high-pressure mercury lamps (Philip HPLN 400 W) at about 700  $\mu\text{mol}$   
140  $\text{m}^{-2} \text{s}^{-1}$  for 12 h perday (7:00-19:00). Plants for cold treatment were transferred to  
141 another chamber in which the temperature was lowered to 15°C/8°C at the 4-leaf  
142 stage. After 3-day chilling treatment, the temperature in the chamber was restored to  
143 28°C/22°C. Control plants remained in the original chamber throughout the  
144 experiment. The second leaves from the apical meristem of each plant were collected  
145 at 16:00 everyday from the day before treatment to the third day after cold stress

146 removal (named C0, C1, C2, C3, R1, R2, R3, respectively). Samples were frozen in  
147 liquid nitrogen immediately after harvest and stored at  $-80^{\circ}\text{C}$ .

148

#### 149 *Non-aqueous fractionation of leaves*

150 The procedure was conducted according to Nadwodnik and Lohaus (2008) and  
151 Krueger *et al.* (2014) with a few modifications. After removing the middle rib and  
152 larger veins, the samples were ground to a fine powder in liquid nitrogen in a  
153 precooled mortar and then lyophilized at  $-25^{\circ}\text{C}$ . The dry leaf powder was suspended  
154 in 20 ml of heptane:tetrachloroethylene mixture (density  $1.3\text{ g ml}^{-1}$ ). Sonication was  
155 performed for 2 min, with  $6 \times 10$  cycles at 65 % power. The sonicated suspension was  
156 filtered through a nylon sieve ( $40\ \mu\text{m}$ ). The sample was centrifuged for 10 min at  
157  $3,200 \times g$  and  $4^{\circ}\text{C}$  and the sediment was resuspended again in the  
158 heptane:tetrachloroethylene mixture (density  $1.3\text{ g ml}^{-1}$ ). The suspension was added to  
159 an exponential heptane-tetrachlorethylene gradient with a density between 1.27 and  
160  $1.50\text{ g ml}^{-1}$ . After centrifugation for 60 min at  $5,000 \times g$  and  $4^{\circ}\text{C}$ , six fractions were  
161 collected, aliquots of which were taken for the determination of the marker enzymes,  
162 RFOs metabolic enzymes and RFOs related sugars. The calculation was carried out  
163 by the software BestFit (Krueger *et al.*, 2014 ).

164

#### 165 *Carbohydrate assay and enzyme activity determination*

166 Chloroform methanol extracts were prepared from the aliquots mentioned above for  
167 the determination of the carbohydrate concentrations (Nadwodnik and Lohaus, 2008).  
168 Galactinol, stachyose, raffinose, galactose, and sucrose were analyzed by HPLC  
169 methods as described previously (Miao *et al.*, 2007). For enzymes assay, fractions  
170 from gradient centrifugation were washed by 3 volumes of  $\text{C}_7\text{H}_{16}$  and lyophilized.  
171 The dried samples were extracted by Hepes buffer (50 mM Hepes-NaOH pH 7.4; 5  
172 mM  $\text{MgCl}_2$ ; 1mM EDTA; 1 mM EGTA; 0.1 % Triton X-100; 10% glycerol; 2mM  
173 benzamidine; 2mM aminocaproic acid; 1.5mM PMSF;  $1\text{ g l}^{-1}$  PVPP) (Krueger *et al.*,  
174 2014). Activities of GS and  $\alpha$ -galactosidases were assayed according to (Wang *et al.*,  
175 2016). For the assay of RS, the reaction buffer contained 50 mM HEPES–NaOH (pH

176 7.0), 1 mM DTT, 10 mM galactinol and 40 mM sucrose. Mixtures were incubated at  
177 30 °C for 3 h and the reactions were stopped by boiling for 5 min. The mixture was  
178 centrifuged at 28,000×g for 5 min and the supernatant was passed through a 0.45 μm  
179 filter. The content of raffinose was determined by HPLC. Enzyme activity is given as  
180 μmol of raffinose formation per hour (Sui *et al.*, 2012). The assay of STS was the  
181 same as that of RS, except galactinol was replaced by raffinose in the reaction system.  
182

### 183 *Total RNA isolation and expression analysis of RS and STS*

184 Total RNA was extracted from approximately 100 mg of the leaf tissues (without  
185 middle ribs and larger veins) using TRIzol reagent (Invitrogen, Shanghai, China).  
186 Reverse transcription was performed using a Prime Script™ RT reagent Kit with  
187 gDNA eraser (Perfect Real Time, TaKaRa, Dalian, China). Quantitative real-time  
188 PCR was performed using the One Step SYBR PrimeScript RT-PCR Kit (TaKaRa,  
189 Dalian, China) on an ABI PRISM 7700 Sequence Detection System (Applied  
190 Biosystems, Shanghai, China), following the manufacturer's instructions. The  
191 real-time PCR was carried out according to the following protocol: 2 min at 94°C,  
192 followed by 39 cycles of 94°C for 15 s, 60°C for 15 s and 72°C for 30 s. The  
193 cucumber 18S rRNA gene (Gene bank accession No.: AF206894.1) was used for  
194 normalization in all the analyses performed. The primer sequences for *RS* and *STS*  
195 (Gene bank accession No.: EU096498) are listed in Supplementary Table S1. Primers  
196 were confirmed to be approximately 90% to 100% efficient in amplification, and  
197  $2^{-\Delta\Delta CT}$  method (Livak and Schmittgen, 2001) was used for analyses.

198

### 199 *Northern blot analysis of the expression of GS and α-galactosidases genes*

200 Total RNA (20μg) was extracted as mentioned above and electrophoresed on a 1.2%  
201 (w/v) agarose gel containing formaldehyde, then transferred onto positively charged  
202 nylon membrane (Amersham-Pharmacia Biotech, Uppsala, Sweden) with 10×SSC  
203 buffer (1×SSC containing 150 mM NaCl and 15 mM sodium citrate, pH 7.0). DNA  
204 fractions of 4 *CsGS* genes and 6 α-galactosidases genes were cloned into pMD 18-T





234 cultured on the 1/2 MS solid medium (30g l<sup>-1</sup> sucrose, 7g l<sup>-1</sup> agar, pH 5.8) for 2 d  
235 ( 25°C, 16h/8h). Plasmolysis cells were obtained by adding 300g l<sup>-1</sup> KNO<sub>3</sub> on the  
236 tissue for 5min before fluorescence microscope observation (Zeiss LSM710).  
237 Transient transformation of tobacco leaves was mainly according to Sparkes *et al.*  
238 (2006). Basically, the underside of the tobacco leaf was punctured with a small needle.  
239 Took up resuspended *Agrobacterium* infiltration liquid (10 mM MgCl<sub>2</sub>, 10 mM MES,  
240 100µM acetosyringone) in a 1 ml syringe (no needle). Placed the tip of the syringe  
241 against the underside of the leaf over the needle mark and pressed down gently on the  
242 plunger. Placed plants in a growth cabinet under normal conditions for 3d, and then  
243 excised 1-2 cm<sup>2</sup> segments of leaf tissue for confocal microscope observation (Zeiss  
244 LSM710).

## 245 **Results**

### 246 *Subcellular distribution of sugars and relative enzymes in cold-stressed cucumber* 247 *leaves*

248 Since RFOs will accumulate after cold stress (Sui *et al.*, 2012), cucumber leaves were  
249 sampled after a 3-day cold treatment. The distribution of the sugars and relative  
250 enzymes among the vacuolar, chloroplast, and cytosolic compartment was measured  
251 by non-aqueous fractionation method and the results are summarized in the Table 1.  
252 Stachyose and galactose were almost exclusively found in the vacuole, sucrose and  
253 raffinose were distributed in all three compartments, while galactinol was located  
254 mainly in the vacuole and cytosol. Three RFOs synthesis enzymes, GS, RS and STS,  
255 were mostly located in the cytosol. The GAL activity was mainly found in the vacuole  
256 whereas the AGA activity was mostly distributed in both chloroplast and cytosol  
257 (Table 1).

### 258 *Suggested position of Table 1*

#### 259 *Change of sugar levels during cold treatment and recovery*

260 According to the subcellular distribution of sugars (Table 1), levels of galactinol,  
261 sucrose, raffinose, stachyose and galactose in vacuole, sucrose and raffinose in  
262 chloroplast, and galactinol, sucrose and raffinose in cytosol were investigated during

263 the cold stress and recovery period (Fig. 1). The levels of all measured sugars except  
264 galactose increased from 0 d to 3 d of cold treatment and then decreased when the  
265 temperature was recovered to the normal level, indicating low temperature promoted  
266 the accumulation of these sugars in different subcellular compartments. The galactose  
267 level showed an opposite pattern, which decreased during cold stress and increased  
268 during the recovery period in the vacuole. The amplitude of fluctuation of sugar levels  
269 was more significant in vacuole and chloroplast than in cytosol. No significant  
270 fluctuations of sugar levels were found in control plant leaves during the treatment  
271 (Supplementary Fig. S1).

272

273 *The expression and activities of RFOs synthesis enzymes during cold treatment and*  
274 *recovery*

275 Four *GSs* showed different expression patterns under cold stress. Under normal  
276 temperature, the expressions of *CsGS1* and *CsGS4* were detected and the expression  
277 of *CsGS4* was stronger than that of *CsGS1*, while the expressions of *CsGS2* and  
278 *CsGS3* were not detected by the northern blot. Cold treatment had no significant  
279 effect on the expression of *CsGS1*. However, *CsGS2*, *CsGS3* and *CsGS4* expressions  
280 were enhanced by the low temperature, and RNAs of *CsGS2* and *CsGS3* could be  
281 detected at the 3rd day of cold treatment. After the stress removal, the RNAs levels of  
282 these three genes declined gradually. At the 3rd day of temperature recovery, the  
283 expression of *CsGS3* fell below the detection limit (Fig. 2A). The GS activity was  
284 closely correlated to the expression pattern of the *CsGS2*, *CsGS3* and *CsGS4*, which  
285 increased under the cold stress and decreased after the stress removal (Fig. 2B).

286 The *RS* showed a similar expression pattern to that of the *CsGS2*, *CsGS3* and  
287 *CsGS4*. The RNA level of *RS* was significantly up-regulated by the low temperature,  
288 and then declined after the stress removal (Fig. 3A). The *RS* activity also increased,  
289 and was higher than that of control plant at the 3rd day of recovery (Fig. 3B). No clear  
290 effect of cold stress on the *STS* expression and enzyme activity was observed in this  
291 study (Fig. 3C, D).

292

293 *The expressions and activities of galactosidases during cold treatment and recovery*

294 As shown in Fig. 4A, among 3 *GALs*, only *GAL1* RNA was detected under normal  
295 temperature, and low temperature treatment and recovery have no significant effect on  
296 its level. *GAL2* mRNA was not detected under both treatments. The expression of  
297 *GAL3* was undetectable under both normal and low temperature, but was induced  
298 remarkably when the cold stress was removed. mRNAs of all 3 *AGAs* were detected  
299 under the normal temperature. No significant effect of temperature change on the  
300 *AGA1* expression was found. However, the RNA levels of both *AGA2* and *AGA3* were  
301 down-regulated by the cold stress and then restored to normal levels after cold stress  
302 removal (Fig. 4 B). Both GAL and AGA activities were measured in different  
303 subcellular compartments (Fig. 5). Two substrate, raffinose and stachyose were used  
304 in the enzyme assay. The GAL activity was higher with the substrate raffinose, while  
305 AGA activity was higher with stachyose. The fluctuation patterns of enzyme activities  
306 with two substrates were similar in all treatments. In vacuole, the GAL activity  
307 remained unchanged during cold stress and increased significantly after stress  
308 removal. In chloroplast and cytosol (Fig. 5A, C), the AGA activities were  
309 down-regulated by the low temperature and then up-regulated by the stress removing  
310 (Fig. 5 B, D). No significant fluctuation of GAL or AGA activities was found in  
311 control plant leaves during the treatment (Supplementary Fig. S2). These results  
312 indicated that *GAL3*, *AGA2* and *AGA3* were important for RFOs catabolism during  
313 the temperature recovery.

314

315 *Subcellular localization of galactosidase proteins*

316 To obtain further insight into the mechanism of RFOs catabolism after cold stress  
317 removal, an EGFP protein was fused to the N-terminus of 6 galactosidases, and placed  
318 under the control of the CaMV 35S promoter. These constructs were transiently  
319 expressed in the onion epidermal cells. To distinguish the cell wall and the cytosol in  
320 these highly vacuolate cells, plasmolysis was carried out before transformation.  
321 Fluorescence microscope imaging showed that *GAL1* and *GAL2* were located near  
322 the cell wall, *GAL3* was found in the vacuole, while all 3 *AGAs* were distributed in

323 the cytosol (Fig. 6). The subcellular localization of AGA2 and AGA3, which were  
324 found to play a role in catabolizing RFOs in cytosol or chloroplast, were further  
325 determined by transiently expressing the EGFP fusion construct in the tobacco  
326 mesophyll cell. The results revealed that AGA2 was located in the cytosol, while  
327 AGA3 was mostly found in the chloroplast (Fig. 7).

328

## 329 **Discussion**

330 The subcellular compartment study of RFOs and relative carbohydrates after cold  
331 stress in cucumber leaves using non-aqueous fractionation method showed similar  
332 results with previous reports, *i.e.*, stachyose and galactose were mostly in the vacuole,  
333 galactinol in the vacuole and cytosol, and sucrose and raffinose in the vacuole, cytosol  
334 and chloroplast (Schneider and Keller, 2009; Knaupp et al., 2011; Nägele and Heyer,  
335 2013; Findling *et al.*, 2015). In cucumber leaves, besides accumulating after cold  
336 stress, RFOs are synthesized in the cytosol of intermediary cells in the minor veins for  
337 phloem transport (Turgeon and Wolf, 2009). The effect of this “transport RFOs pool”  
338 on the results in this study seemed negligible, since little stachyose are found in the  
339 cytosol (Table 1). The levels of galactinol, sucrose and raffinose increased under the  
340 low temperature treatment and decreased after the stress removal, similar phenomena  
341 were also found in other plant species (Cunningham *et al.*, 2003; Brenac *et al.*, 2013;  
342 ElSayed *et al.*, 2014). The results of this study, together with data from *Ajuga reptans*  
343 (Bachmann *et al.*, 1994), suggest that accumulations of RFOs are also important for  
344 RFOs translocating species to deal with cold stress. Iftime *et al.* (2011) have shown  
345 that stachyose accumulation in transgenic *Arabidopsis* plants did not increase the  
346 freezing tolerance. However, the up-regulated level of this tetrasaccharide in the  
347 vacuole in cold acclimated cucumber and *Ajuga reptans* leave tissues (Findling *et al.*,  
348 2015; this study) suggest that stachyose may exert its protective role in these  
349 RFOs-translocating plants. Unlike *Ajuga reptans*, cucumber does not accumulated  
350 higher RFO oligomers in leaves (Meng *et al.*, 2008). The physiological importance of  
351 stachyose accumulated in the vacuole during cold stress in cucumber leaves awaits

352 further research.

353 GSs are always encoded by multiple genes in plant genomes. Evidences indicated that  
354 these isoforms have different cellular locations and physiological functions. In  
355 *Arabidopsis*, *AtGols1* and *AtGols 2* were induced by drought and high-salinity  
356 stresses, while *AtGols3* was induced by cold stress (Taji *et al.*, 2002). In the  
357 stachyose-translocating plant *Ajuga reptans*, *ArGols1* expressed in the mesophyll for  
358 storage RFOs synthesis and *ArGols2* mainly in the intermediary cell for transport  
359 RFOs synthesis (Sprenger and Keller, 2000). In the melon (*Cucumis melo*), Cucumber  
360 mosaic virus and heat stress did not affect the expression level of *CmGols1*, but  
361 caused a significant increase in the relative expression level of *CmGols2* (Gil *et al.*,  
362 2012). In this study, in cucumber leaves *CsGS1* expressed constitutively and was not  
363 affected by the cold stress, while the expressions of other three *CsGSs* were  
364 up-regulated by the low temperature. Phylogenetic analysis based on the amino acid  
365 sequences indicated that cucumber *CsGS1* and *CmGloS1* are closely related, while  
366 cucumber *CsGS4* and *CmGloS2* cluster into one group (Supplementary Fig. S3). It is  
367 not clear if the function of *CsGS1* and *CmGloS1* is similar to that of the *Ajuga reptans*  
368 *ArGols2* (for transport RFOs synthesis). *CsGS2* and *CsGS3* showed similar  
369 expression pattern during the temperature treatment, *i.e.*, could not be detected under  
370 normal temperature and induced by cold stress. In the phylogenetic tree, cucumber  
371 *CsGS2* is closely related to the *SmGloS3*, which has a low constitutive expression and  
372 could be induced by several abiotic stresses in *Salvia miltiorrhiza* (Wang *et al.*, 2012).  
373 *CsGS3*, *AtGols2* and *AtGols3* belong to the same group (Supplementary Fig. S3). It  
374 seemed that the function of *GSs* in abiotic stress is mainly determined by which  
375 element exists in their promoter area, rather than the amino acid sequences (Taji *et al.*,  
376 2002). The response patterns of 4 *CsGSs* to other abiotic stresses need further  
377 investigation. Other two RFOs biosynthetic enzymes, RS and STS, revealed different  
378 expression and activity patterns during temperature treatment, RS was up-regulated  
379 by cold stress but STS not. The increased level of substrate raffinose, rather than the  
380 biosynthetic enzymes STS, may result in the stachyose accumulation under low  
381 temperature. In addition, the cytosol compartment of GS, RS and STS, the chloroplast

382 and vacuole localization of raffinose and the vacuole localization of stachyose, further  
383 confirm that there are RFOs transporters on the tonoplast and chloroplast envelope in  
384 RFOs-translocating plants (Greutert and Keller, 1993; Schneider and Keller, 2009;  
385 Nägele and Heyer, 2013 ).

386 Up to date, little research has been focused on the catabolism process of RFOs  
387 after stress conditions are removed in leaf tissues. Subcellular localizations of 6  
388 cucumber galactosidases, which are considered key enzymes in the pathway, were  
389 studied in this research. Tapernoux-Lüthi *et al.* (2007) concluded that a C-terminal  
390 oligopeptide extension is a non-sequence-specific vacuolar sorting determinant of  
391 plant galactan:galactan galactosyltransferase and acid galactosidase. Sequence  
392 analysis revealed that among 3 cucumber *GALs*, only *GAL3* has this C-terminal  
393 oligopeptide extension (Supplementary Fig. S4), indicating the vacuolar compartment  
394 of *GAL3*, and the apoplastic location of *GAL1* and *GAL2*. The results of our EGFP  
395 fusion protein transiently expression experiments confirmed that *GAL3* is the only  
396 acid galactosidase located in the vacuole. Combining with the expression and activity  
397 pattern during the temperature treatment, we concluded that *GAL3* was responsible for  
398 the RFOs catabolism in vacuoles after stress removal. Alkaline galactosidases were  
399 always considered to be distributed in the cytosol (Keller and Pharr, 1996). *Osh69*, a  
400 rice alkaline galactosidase, was found to be located in the chloroplast and play a role  
401 during leaf senescence (Lee *et al.*, 2004). In this study, cucumber *AGA3* protein was  
402 found in the chloroplast and its expression was down-regulated by the cold stress and  
403 up-regulated by the temperature recovery, strongly suggests an important role for  
404 *AGA3* in chloroplast RFOs catabolism after cold stress removal. The alkaline  
405 environment of chloroplast stroma is suitable for the *AGA3* to exert its catalytic  
406 function (Findling *et al.*, 2015). The data of this study also indicated that another  
407 alkaline galactosidase, *AGA 2*, is responsible for RFOs catabolism in the cytosol after  
408 temperature was recovered to normal level.

409 In conclusion, our results indicate that RFOs accumulated during cold stress in  
410 different subcellular compartments in cucumber leaves could be catabolized *in situ* by  
411 different galactosidases after stress removed. The data do not rule out the possibility

412 that RFOs are translocated to other subcellular compartments for degradation.

413

#### 414 **Supplementary data**

415 **Fig. S1.** Changes of sugar levels in different subcellular compartments of control  
416 plant leaves during treatment.

417 **Fig. S2.** Changes of  $\alpha$ -galactosidase activities in different subcellular compartments  
418 of control plant leaves during treatment.

419 **Fig. S3.** Phylogenetic tree representing the relationship of galactinol synthase genes  
420 from different plant species with the full-length protein sequence reported.

421 **Fig. S4.** Sequence comparison of C-terminal peptides of three cucumber acid  
422 alpha-galactosidase genes.

423 **Table S1.** Primers used for real-time PCR and Northern hybridize probe synthesis.

424 **Table S2.** Primers used for EGFP fusion protein vector construction.

425

#### 426 **Acknowledgements**

427 This work was supported by the National Natural Science Foundation of China (grant  
428 no. 31672160).

#### **References**

- Bachmann M, Keller F.** 1995. Metabolism of the raffinose family oligosaccharides in leaves of *Ajuga reptans* L. Inter- and intracellular compartmentation. *Plant Physiology* **109**, 991-998.
- Bachmann M, Philippe M, Keller F.** 1994. Metabolism of the raffinose family oligosaccharides in leaves of *Ajuga reptans* L. Cold acclimation, translocations, and sink to source transition: discovery of chain elongation enzyme. *Plant Physiology* **105**, 1335-1345.
- Brenac P, Horbowicz M, Smith ME, Obendorf RL.** 2013. Raffinose and stachyose accumulate in hypocotyls during drying of common buckwheat seedlings. *Crop Science* **53**, 1615-1625.

- Cunningham SM, Nadeau P, Castonguay Y, Laberge S, Volenec JJ.** 2003. Raffinose and stachyose accumulation, galactinol synthase expression, and winter injury of contrasting alfalfa germplasms. *Crop Science* **43**, 562-570.
- ElSayed AI, Rafudeen MS, Gollidack D.** 2014. Physiological aspects of raffinose family oligosaccharides in plants: protection against abiotic stress. *Plant Biology* **16**, 1-8.
- Findling S, Zanger K, Krueger S, Lohaus G.** 2015. Subcellular distribution of raffinose oligosaccharides and other metabolites in summer and winter leaves of *Ajuga reptans* (Lamiaceae). *Planta* **241**, 229-241.
- Gangl R, Tenhaken R.** 2016. Raffinose family oligosaccharides act as galactose stores in seeds and are required for rapid germination of *Arabidopsis* in the dark. *Frontiers in Plant Science* **7**, 1115.
- Gil L, Ben-Ari J, Turgeon R, Wolf S.** 2012. Effect of CMV infection and high temperature on the enzymes involved in raffinose family oligosaccharide biosynthesis in melon plants. *Journal of Plant Physiology* **169**, 965-970.
- Greutert H, Keller F.** 1993. Further evidence for stachyose and sucrose/H<sup>+</sup> antiporters on the tonoplast of Japanese artichoke (*Stachys sieboldii*) tubers. *Plant Physiology* **101**, 1317-1322.
- Iftimea D, Hannah MA, Peterbauer T, Heyer AG.** 2011. Stachyose in the cytosol does not influence freezing tolerance of transgenic *Arabidopsis* expressing stachyose synthase from adzuki bean. *Plant Science* **180**, 24-30.
- Ivamoto ST, Reis O Júnior, Domingues DS, dos Santos TB, de Oliveira FF, Pot D, et al.** 2017. Transcriptome analysis of leaves, flowers and fruits perisperm of *Coffea arabica* L. reveals the differential expression of genes involved in raffinose biosynthesis. *PLoS ONE* **12**, e0169595.
- Keller F, Pharr DM.** 1996. Metabolism of carbohydrates in sinks and sources: galactosyle-sucrose oligosaccharides. In: Zamsk E, Schaffer AA, eds. *Photoassimilate Distribution in Plants and Crops*. New York: Marcel Dekker, 157-183.
- Knaupp M, Mishra KB, Nedbal L, Heyer AG.** 2011. Evidence for a role of raffinose in stabilizing photosystem II during freeze-thaw cycles. *Planta* **234**,



477–486.

**Krueger S, Steinhäuser D, Lisec J, Giavalisco P.** 2014. Analysis of subcellular metabolite distributions within *Arabidopsis thaliana* leaf tissue: a primer for subcellular metabolomics. *Methods in Molecular Biology* **1062**, 575-596.

**Lee RH, Lin MC, Chen SC.** 2004. A novel alkaline-galactosidase gene is involved in rice leaf senescence. *Plant Molecular Biology* **55**, 281-295.

**Livak KJ, Schmittgen TD.** 2001. Analysis of relative gene expression data using real-time quantitative PCR and the  $2^{-\Delta\Delta CT}$  method. *Methods* **25**, 402-08.

**Meng FZ, Hu LP, Wang SH, Sui XL, Wei L, Wei YX, Sun JL, Zhang ZX.** 2008. Effects of exogenous abscisic acid (ABA) on cucumber seedling leaf carbohydrate metabolism under low temperature. *Plant Growth Regulation* **56**, 233-244.

**Nägele T, Heyer AG.** 2013. Approximating subcellular organisation of carbohydrate metabolism during cold acclimation in different natural accessions of *Arabidopsis thaliana*. *New phytologist* **198**, 777-787.

**Nishizawa A, Yabuta Y, Shigeoka S.** 2008. Galactinol and raffinose constitute a novel function to protect plants from oxidative damage. *Plant Physiology* **147**, 1251-1263.

**Saito M, Yoshida M.** 2011. Expression analysis of the gene family associated with raffinose accumulation in rice seedlings under cold stress. *Journal of Plant Physiology* **168**, 2268-2271.

**Schneider T, Keller F.** 2009. Raffinose in chloroplasts is synthesized in the cytosol and transported across the chloroplast envelop. *Plant Cell Physiology* **50**, 2174-2182.

**Sengupta S, Mukherjee S, Basak P, Majumder AL.** 2015. Significance of galactinol and raffinose family oligosaccharide synthesis in plants. *Frontiers in Plant Science* **6**, 656.

**Sparkes IA, Runions J, Kearns A, Hawes C.** 2006. Rapid transient expression of fluorescent fusion proteins in tobacco plants and generation of stably transformation plants. *Nature Protocols* **1**, 2019-2025.

**Sprenger N, Keller F.** 2000. Allocation of raffinose family oligosaccharides to

transport and storage pools in *Ajuga reptans*: the roles of two distinct galactinol synthases. *Plant Journal* **21**, 249-258.

**Sui XL, Meng FZ, Wang HY, Wei YX, Li RF, Wang ZY, Hu LP, Wang SH, Zhang ZX.** 2012. Molecular cloning, characteristics and low temperature response of raffinose synthase gene in *Cucumis sativus* L. *Journal of Plant Physiology* **169**, 1883-1891.

**Taji T, Ohsumi C, Iuchi S, Seki M, Kasuga M, Kobayashi M, Yamaguchi-Shinozaki K, Shinozaki K.** 2002. Important roles of drought and cold-inducible genes for galactinol synthase in stress tolerance in *Arabidopsis thaliana*. *Plant Journal* **29**, 417-426.

**Tapernoux-L EM, Schneider T, Keller F.** 2007. The C-terminal sequence from common bugle leaf galactan:galactan galactosyltransferase is a non-sequence-specific vacuolar sorting determinant. *FEBS Letters* **581**, 1811-1818

**Turgeon R, Wolf S.** 2009. Phloem transport: cellular pathways and molecular trafficking. *Annual Review of Plant Biology* **60**, 207-221.

**Wang CL, Zhang ZP, Miao MM.** 2016. SNF1-related protein kinase (SnRK) 1 involved in the regulation of raffinose family oligosaccharide metabolism in cucumber (*Cucumis sativus* L.) calli. *Journal of Plant Growth Regulation* **35**, 851-864.

**Wang DH, Yao W, Song Y, Liu WC, Wang ZZ.** 2012. Molecular characterization and expression of three galactinol synthase genes that confer stress tolerance in *Salvia miltiorrhiza*. *Journal of Plant Physiology* **169**, 1838-1848.

**Zhang ZP, Deng YK, Song XX, Miao MM.** 2015. Trehalose-6-phosphate and SNF1-related protein kinase 1 are involved in the first-fruit inhibition of cucumber. *Journal of Plant Physiology* **177**, 110-120.

**Zuther E, Buchel K, Hundertmark M, Stitt M, Hinch DK, Heyer AG.** 2004. The role of raffinose in the cold acclimation response of *Arabidopsis thaliana*. *FEBS Letters* **576**, 169-173.

**Table 1.** Percentage distribution of carbohydrates and enzymes of RFOs metabolism among the cytosols, chloroplasts and vacuoles of leaf mesophyll cells in cucumber seedlings under cold stress for 3 days. The data represent the mean  $\pm$ SE of three samples.

| Carbohydrates/enzymes             | Cytosol (%)     | Chloroplast (%) | Vacuole (%)     |
|-----------------------------------|-----------------|-----------------|-----------------|
| Galactinol                        | 53.2 $\pm$ 6.3  | 9.4 $\pm$ 4.2   | 38.4 $\pm$ 10.2 |
| Sucrose                           | 37.2 $\pm$ 17.2 | 40.2 $\pm$ 13.8 | 22.6 $\pm$ 8.4  |
| Raffinose                         | 42.1 $\pm$ 12.4 | 21.8 $\pm$ 9.6  | 36.1 $\pm$ 15.3 |
| Stachyose                         | 1.7 $\pm$ 1.3   | 2.1 $\pm$ 1.7   | 96.2 $\pm$ 3.6  |
| Galactose                         | 0.9 $\pm$ 1.4   | 0.8 $\pm$ 2.3   | 98.3 $\pm$ 4.3  |
| Acid- $\alpha$ -Galactosidase     | 3.2 $\pm$ 0.8   | 1.3 $\pm$ 0.5   | 95.5 $\pm$ 7.2  |
| Alkaline- $\alpha$ -Galactosidase | 66.3 $\pm$ 8.3  | 27.4 $\pm$ 5.6  | 6.3 $\pm$ 3.2   |
| Galactinol synthase               | 100 $\pm$ 0.0   | 0.0 $\pm$ 0.0   | 0.0 $\pm$ 0.0   |
| Raffinose synthase                | 100 $\pm$ 0.0   | 0.0 $\pm$ 0.0   | 0.0 $\pm$ 0.0   |
| Stachyose synthase                | 99.1 $\pm$ 2.6  | 0.0 $\pm$ 0.0   | 0.9 $\pm$ 1.2   |

## Figure legends

**Fig.1.** Changes of sugar levels in different subcellular compartments during cold stress and recovery. C0: cold stress for 0 d; C3: cold stress for 3d; R3: the 3rd day after stress removal. Means  $\pm$  SE (5 samples) followed by different letters are significantly different ( $P < 0.05$ ).

**Fig.2.** Changes of expression and activity of galactinol synthases (GSs) in cucumber leaves during cold stress and recovery. A: expression; B: activity. N: normal temperature (28°C/22°C); C: Cold stress (15°C /8°C); C0, C1, C2, C3: cold stress for 0 d, 1 d, 2 d and 3 d; R1, R2, R3: temperature was restored to normal level for 1 d, 2 d and 3 d. Each point is the average of 5 samples. Error bars represent SEs.

**Fig.3.** Changes of expression and activity of raffinose synthase (RS) and stachyose synthase (STS) in cucumber leaves during cold stress and recovery. A: RS expression; B: RS activity; C: STS expression; D: STS activity. Control: 28°C/22°C; Cold stress: 15°C/8°C; C0, C1, C2, C3: cold stress for 0 d, 1 d, 2 d and 3 d; R1, R2, R3: temperature was restored to normal level for 1 d, 2 d and 3 d. Each point is the average of 5 samples. Error bars represent SEs.

**Fig.4.** Expression of  $\alpha$ -galactosidases in cucumber leaves during cold stress and recovery. A: acid- $\alpha$ -galactosidases (GAL); B: alkaline- $\alpha$ -galactosidases (AGA); N: Normal temperature (28°C/22°C); C: Cold stress(15°C /8°C); C0, C1, C2, C3: cold stress for 0 d, 1 d, 2 d and 3 d; R1, R2, R3: temperature was restored to normal level for 1 d, 2 d and 3 d.

**Fig.5.** Changes of  $\alpha$ -galactosidase activities in different subcellular compartments of cucumber leaves during cold stress and recovery. A and C: using raffinose as substrate; B and D: using stachyose as substrate; C0: Cold stress for 0 d; C3: cold stress for 3d; R3: the 3rd day after stress removal. Means  $\pm$  SE (5 samples) followed by different letters are significantly different ( $P < 0.05$ ).

**Fig.6.** Subcellular localization of acid- $\alpha$ -galactosidases (GALs) and alkaline- $\alpha$ -galactosidases (AGAs). GFP-GAL and GFP-AGA fusion proteins and GFP alone expressed under the control of the CaMV35S promoter in onion epidermal cells were observed under a fluorescent microscope. A1 and A2: GAL1; B1 and B2: GAL2; C1 and C2: GAL3; D1 and D2: AGA1; E1 and E2: AGA2; F1 and F2: AGA3; G1 and G2: GFP alone. A1, B1, C1, D1, E1, F1, G1: Differential interference contrast images; A2, B2, C2, D2, E2, F2, G2: GFP fluorescence signals. To distinguish the cell wall and the cytosol in these highly vacuolate cells, plasmolysis was carried out before transformation. Bars=50 $\mu$ m.

**Fig.7.** Subcellular localization of alkaline- $\alpha$ -galactosidases (AGAs). GFP-AGA2 fusion protein (A1, A2 and A3), GFP-AGA3 fusion protein (B1, B2 and B3) and GFP alone (C1, C2 and C) expressed under the control of CaMV35S promoter in tobacco leaf cells were observed under a confocal microscope. The left column (A1, B1 and C1) shows green channel (GFP signal, 488 nm), the middle column (A2, B2 and C2) shows red channel (chloroplast autofluorescence signal, 633nm), and the right column (A3, B3 and C3) shows merged images. Bars=10 $\mu$ m.

**Fig. 1**

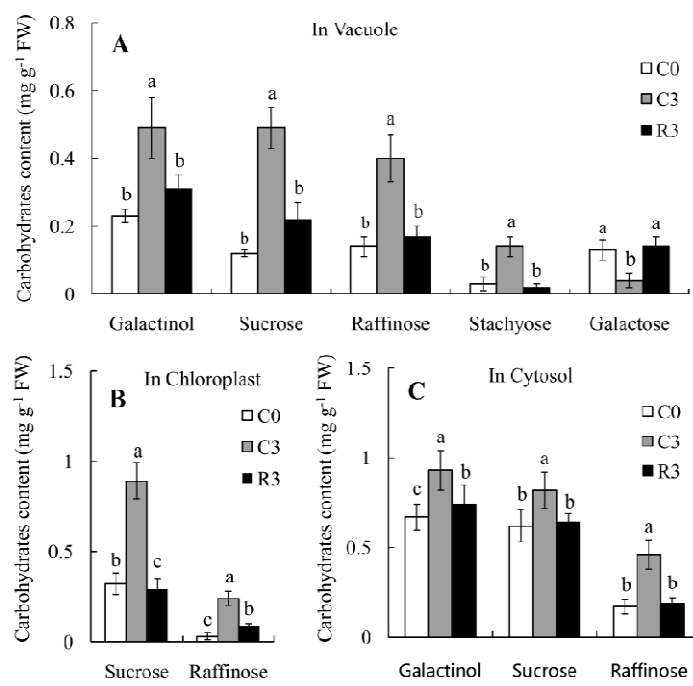

**Fig. 2**

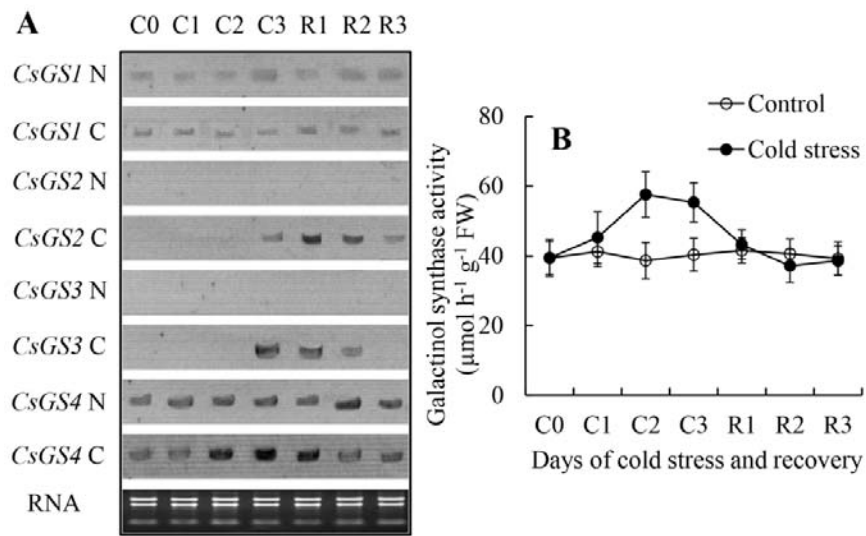

**Fig. 3**

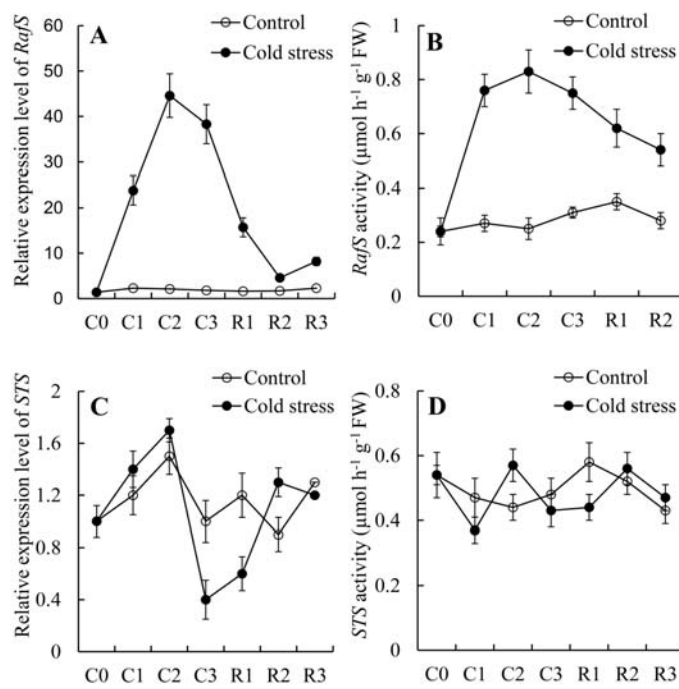



**Fig. 4**

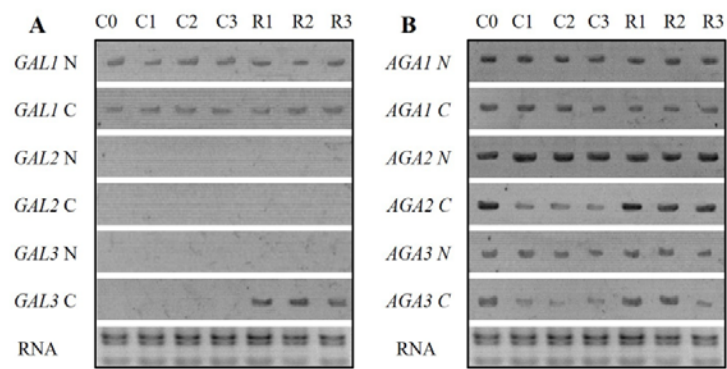

**Fig. 5**

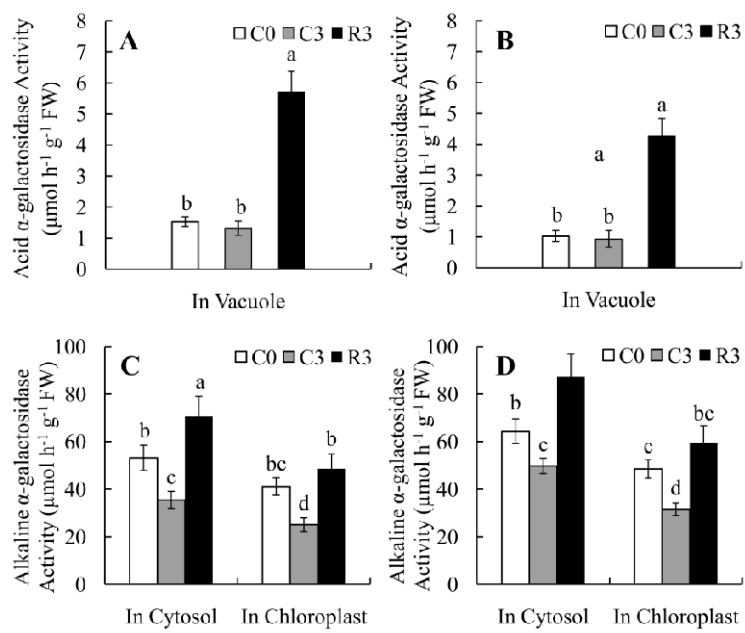

**Fig. 6**

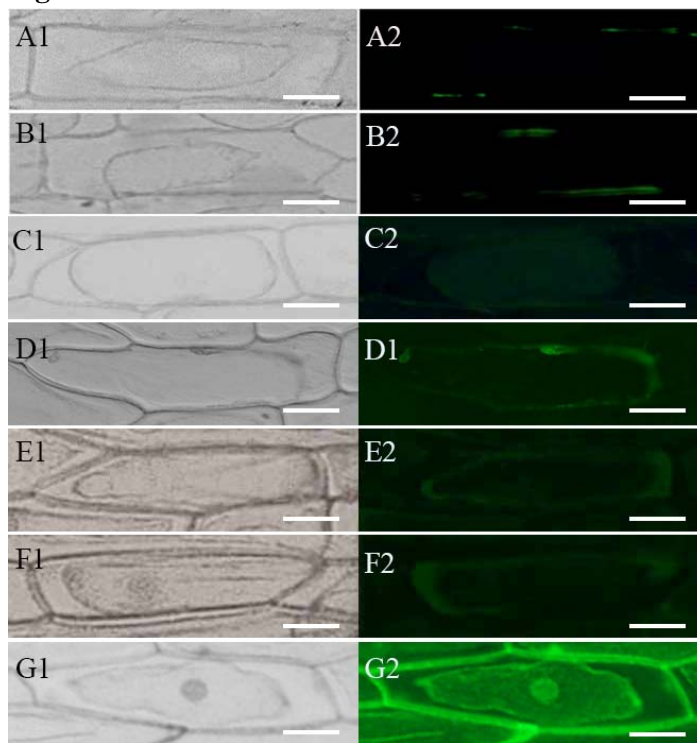

**Fig. 7**

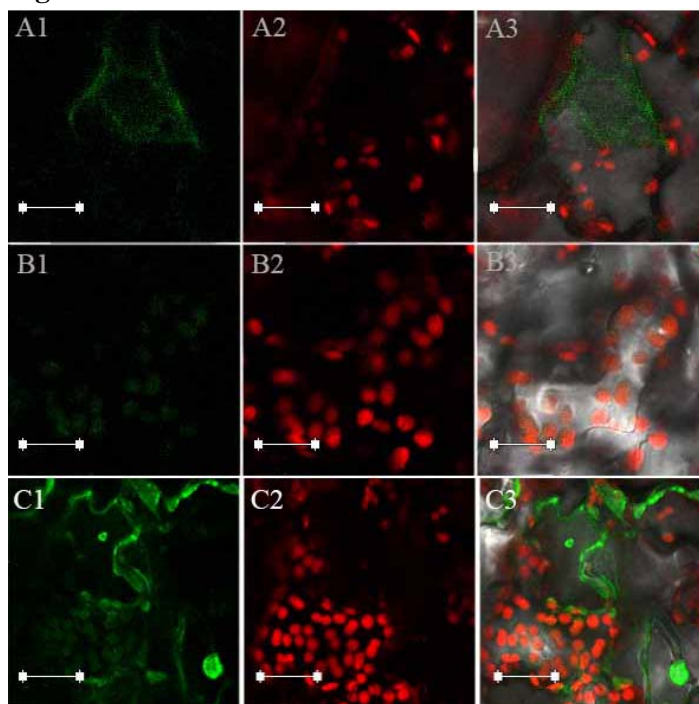

Source: https://www.biorxiv.org/content/10.1101/160051v1.full.pdf
